# Supplementary material for: Intensive Livestock Farming and Residential Health: Experts’ Views
Source: MDPI journal article supplement (doi:10.3390/ijerph16193625), 2019-09-27
Supplement: s1 [file s1]

## **Supplementary Materials: Interview Questions**

### Professional background

1. To begin with, can you tell me something about your work and the relationship with intensive livestock farming?

### General intensive livestock farming

2. What do you think is "intensive livestock farming"?
  - a. What do you understand under "(non-intensive) livestock farming", "mega-farm"?
3. What comes to mind when I say intensive livestock farming?

### Public health risks

4. Can you tell me what human health has to do with intensive livestock farming? (negative & positive)?
5. In your opinion, what are the human health risks with regard to intensive livestock farming?
6. Based on the literature, I compiled a list of human health hazards concerning intensive livestock farming (show list) What do you think of this list? Is this complete?

### Ranking

7. I have put these human health hazards on cards (show plasticized cards). Now my question is: Which risks do you consider the biggest problem in relation to intensive livestock farming  
Can you make a top 3 and elaborate your choice?
8. Which risks do you consider the smallest problem in relation to intensive livestock farming?  
Can you make a top 3 and elaborate your choice?

### Specific public health risks

9. When it comes to your own expertise within the context of intensive livestock farming, can you tell me more about \_\_\_\_\_ (i.e. particulate matter, infectious diseases etc.) and the human health problem?

### Other themes

10. In addition to public health, what other issues can you think of when I say in intensive livestock farming?

### Concerns

11. As a scientist, are you worried about intensive livestock farming? What are those concerns?

- a. Human health?
  - b. Other themes?
12. What do you think citizens are concerned about when it comes to intensive livestock farming?
- Are there differences between population groups (local residents)?
- a. Human health?
  - b. Other themes?

Suggestions other scientific experts

13. Are there scientific experts who you would recommend to interview on this subject?

Before ending the interview, I would like to ask you whether there are still aspects related to intensive livestock farming that have not been covered in this interview but are important for this research?
